# Supplementary material for: An international study presenting a federated learning AI platform for pediatric brain tumors
Source: PubMed Central journal article supplement — Nat Commun. 2024 Sep 2;15:7615. doi: 10.1038/s41467-024-51172-5 (PMC11368946; doi:10.1038/s41467-024-51172-5), 2024-09-02
Supplement: 41467_2024_51172_MOESM1_ESM.pdf [file 41467_2024_51172_MOESM1_ESM.pdf]

## Supplemental Information File

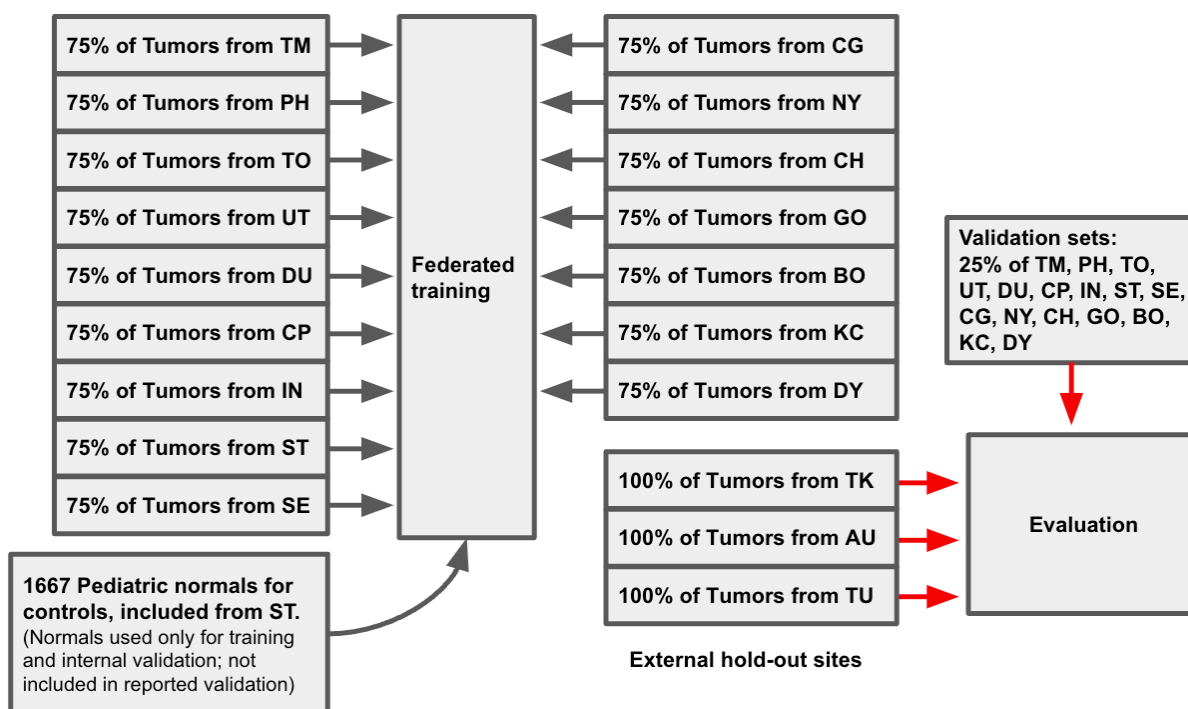

Supplemental Figure 1. Diagram detailing the data sources used for the FL training and evaluation (1468 patients with pediatric brain tumors from the centers along with 1667 normal controls).

Supplemental Table 1. Table of siloed models trained and evaluated internally on each site. The F1 and mean dice scores (DS) across classes are shown in percentages. The performance is poor due to the relatively small datasets per site.

|        | Site ID |       |       |       |       |       |       |       |
|--------|---------|-------|-------|-------|-------|-------|-------|-------|
|        | TM      | PH    | TO    | UT    | DU    | CP    | IN    | ST    |
| F1 (%) | 42.86   | 12.50 | 28.33 | 27.78 | 65.00 | 36.83 | 43.65 | 71.14 |
| DS (%) | 7.12    | 10.52 | 40.47 | 57.62 | 0.00  | 57.90 | 51.30 | 44.77 |

  

|        | Site ID |       |       |       |       |      |      |       |
|--------|---------|-------|-------|-------|-------|------|------|-------|
|        | SE      | CG    | NY    | CH    | GO    | BO   | KC   | DY    |
| F1 (%) | 64.06   | 27.93 | 20.00 | 20.00 | 34.52 | 0.00 | 0.00 | 15.00 |
| DS (%) | 45.21   | 42.57 | 0.01  | 2.94  | 22.05 | 0.00 | 1.37 | 0.00  |
