# Supplementary material for: An international study presenting a federated learning AI platform for pediatric brain tumors
Source: PubMed Central journal article supplement — Nat Commun. 2024 Sep 2;15:7615. doi: 10.1038/s41467-024-51172-5 (PMC11368946; doi:10.1038/s41467-024-51172-5), 2024-09-02
Supplement: 41467_2024_51172_MOESM3_ESM.pdf [file 41467_2024_51172_MOESM3_ESM.pdf]

## Reporting Summary

Nature Portfolio wishes to improve the reproducibility of the work that we publish. This form provides structure for consistency and transparency in reporting. For further information on Nature Portfolio policies, see our [Editorial Policies](#) and the [Editorial Policy Checklist](#).

### Statistics

For all statistical analyses, confirm that the following items are present in the figure legend, table legend, main text, or Methods section.

n/a | Confirmed

- The exact sample size ( $n$ ) for each experimental group/condition, given as a discrete number and unit of measurement
- A statement on whether measurements were taken from distinct samples or whether the same sample was measured repeatedly
- The statistical test(s) used AND whether they are one- or two-sided  
*Only common tests should be described solely by name; describe more complex techniques in the Methods section.*
- A description of all covariates tested
- A description of any assumptions or corrections, such as tests of normality and adjustment for multiple comparisons
- A full description of the statistical parameters including central tendency (e.g. means) or other basic estimates (e.g. regression coefficient) AND variation (e.g. standard deviation) or associated estimates of uncertainty (e.g. confidence intervals)
- For null hypothesis testing, the test statistic (e.g.  $F$ ,  $t$ ,  $r$ ) with confidence intervals, effect sizes, degrees of freedom and  $P$  value noted  
*Give  $P$  values as exact values whenever suitable.*
- For Bayesian analysis, information on the choice of priors and Markov chain Monte Carlo settings
- For hierarchical and complex designs, identification of the appropriate level for tests and full reporting of outcomes
- Estimates of effect sizes (e.g. Cohen's  $d$ , Pearson's  $r$ ), indicating how they were calculated

*Our web collection on [statistics for biologists](#) contains articles on many of the points above.*

### Software and code

Policy information about [availability of computer code](#)

Data collection All code uses open-source TensorFlow and other python libraries. Please see the github project for more details.

Data analysis Same as above. All code uses TensorFlow and other open-source python libraries.

For manuscripts utilizing custom algorithms or software that are central to the research but not yet described in published literature, software must be made available to editors and reviewers. We strongly encourage code deposition in a community repository (e.g. GitHub). See the Nature Portfolio [guidelines for submitting code & software](#) for further information.

### Data

Policy information about [availability of data](#)

All manuscripts must include a [data availability statement](#). This statement should provide the following information, where applicable:

- Accession codes, unique identifiers, or web links for publicly available datasets
- A description of any restrictions on data availability
- For clinical datasets or third party data, please ensure that the statement adheres to our [policy](#)

The MRI data in this study have been deposited in the Stanford Research Database in <https://doi.org/10.25740/bf070wx6289>. The dataset used to develop the model consisting of approximately 1200 patients with pediatric brain tumors are included and organized by site. The remaining patients used as the test sets will be included in the near future as we have plans to organize federated learning and foundation model challenges behind a hidden evaluation server. Nonetheless, this

data along with pediatric brain normal can be requested by the reader. Furthermore, clinical factors and notes including sex and age for each data sample will also be provided in the near future. Please see the project link for any future updates. Source data for the figures are also provided with this paper.

## Research involving human participants, their data, or biological material

Policy information about studies with [human participants or human data](#). See also policy information about [sex, gender \(identity/presentation\), and sexual orientation](#) and [race, ethnicity and racism](#).

|                                                                    |                                                                                                                                                                                                                                                                                                                                                                                                                                                                |
|--------------------------------------------------------------------|----------------------------------------------------------------------------------------------------------------------------------------------------------------------------------------------------------------------------------------------------------------------------------------------------------------------------------------------------------------------------------------------------------------------------------------------------------------|
| Reporting on sex and gender                                        | In this retrospective study, data collection across the 19 hospitals was unbiased, as these tumors in the posterior fossa in children are quite rare. Our work aims to show the feasibility of learning big models across centers without data share and with few data samples per center. Table 1 presents the sex distribution across the sites and pathologies. Additionally, we plan to include clinical notes, including sex and age, in the near future. |
| Reporting on race, ethnicity, or other socially relevant groupings | Sample collection was unbiased. Sex and/or gender were not considered for sample selection. However, data was analyzed across different hospitals on all continents, including Africa.                                                                                                                                                                                                                                                                         |
| Population characteristics                                         | N/A                                                                                                                                                                                                                                                                                                                                                                                                                                                            |
| Recruitment                                                        | N/A                                                                                                                                                                                                                                                                                                                                                                                                                                                            |
| Ethics oversight                                                   | Our manuscript contains the IRB approval info.                                                                                                                                                                                                                                                                                                                                                                                                                 |

Note that full information on the approval of the study protocol must also be provided in the manuscript.

## Field-specific reporting

Please select the one below that is the best fit for your research. If you are not sure, read the appropriate sections before making your selection.

Life sciences  Behavioural & social sciences  Ecological, evolutionary & environmental sciences

For a reference copy of the document with all sections, see [nature.com/documents/nr-reporting-summary-flat.pdf](https://nature.com/documents/nr-reporting-summary-flat.pdf)

## Life sciences study design

All studies must disclose on these points even when the disclosure is negative.

|                 |                                                    |
|-----------------|----------------------------------------------------|
| Sample size     | The sample size represents the number of patients. |
| Data exclusions | N/A                                                |
| Replication     | Please see the github for replication.             |
| Randomization   | N/A                                                |
| Blinding        | N/A                                                |

## Reporting for specific materials, systems and methods

We require information from authors about some types of materials, experimental systems and methods used in many studies. Here, indicate whether each material, system or method listed is relevant to your study. If you are not sure if a list item applies to your research, read the appropriate section before selecting a response.

### Materials & experimental systems

| n/a                                 | Involved in the study                                  |
|-------------------------------------|--------------------------------------------------------|
| <input checked="" type="checkbox"/> | <input type="checkbox"/> Antibodies                    |
| <input checked="" type="checkbox"/> | <input type="checkbox"/> Eukaryotic cell lines         |
| <input checked="" type="checkbox"/> | <input type="checkbox"/> Palaeontology and archaeology |
| <input checked="" type="checkbox"/> | <input type="checkbox"/> Animals and other organisms   |
| <input type="checkbox"/>            | <input checked="" type="checkbox"/> Clinical data      |
| <input checked="" type="checkbox"/> | <input type="checkbox"/> Dual use research of concern  |
| <input checked="" type="checkbox"/> | <input type="checkbox"/> Plants                        |

### Methods

| n/a                                 | Involved in the study                                      |
|-------------------------------------|------------------------------------------------------------|
| <input checked="" type="checkbox"/> | <input type="checkbox"/> ChIP-seq                          |
| <input checked="" type="checkbox"/> | <input type="checkbox"/> Flow cytometry                    |
| <input type="checkbox"/>            | <input checked="" type="checkbox"/> MRI-based neuroimaging |

## Clinical data

Policy information about [clinical studies](#)

All manuscripts should comply with the ICMJE [guidelines for publication of clinical research](#) and a completed [CONSORT checklist](#) must be included with all submissions.

|                             |                                              |
|-----------------------------|----------------------------------------------|
| Clinical trial registration | N/A, this is a retrospective study.          |
| Study protocol              | N/A, this is a retrospective study.          |
| Data collection             | Data collection times are in the manuscript. |
| Outcomes                    | N/A                                          |

## Plants

|                       |                                                                                                                                                                                                                                                                                                                                                                                                                                                                                                                                                          |
|-----------------------|----------------------------------------------------------------------------------------------------------------------------------------------------------------------------------------------------------------------------------------------------------------------------------------------------------------------------------------------------------------------------------------------------------------------------------------------------------------------------------------------------------------------------------------------------------|
| Seed stocks           | <i>Report on the source of all seed stocks or other plant material used. If applicable, state the seed stock centre and catalogue number. If plant specimens were collected from the field, describe the collection location, date and sampling procedures.</i>                                                                                                                                                                                                                                                                                          |
| Novel plant genotypes | <i>Describe the methods by which all novel plant genotypes were produced. This includes those generated by transgenic approaches, gene editing, chemical/radiation-based mutagenesis and hybridization. For transgenic lines, describe the transformation method, the number of independent lines analyzed and the generation upon which experiments were performed. For gene-edited lines, describe the editor used, the endogenous sequence targeted for editing, the targeting guide RNA sequence (if applicable) and how the editor was applied.</i> |
| Authentication        | <i>Describe any authentication procedures for each seed stock used or novel genotype generated. Describe any experiments used to assess the effect of a mutation and, where applicable, how potential secondary effects (e.g. second site T-DNA insertions, mosaicism, off-target gene editing) were examined.</i>                                                                                                                                                                                                                                       |

## Magnetic resonance imaging

### Experimental design

|                                 |                     |
|---------------------------------|---------------------|
| Design type                     | T2-weighted imaging |
| Design specifications           | N/A                 |
| Behavioral performance measures | N/A                 |

### Acquisition

|                               |                                                                                 |
|-------------------------------|---------------------------------------------------------------------------------|
| Imaging type(s)               | T2WI, axial view of brain                                                       |
| Field strength                | Different ranges from 1.5T to 3T, variable due to different scanners used       |
| Sequence & imaging parameters | variable slice thickness, variable relaxation times (TE/TR) due to FL diversity |
| Area of acquisition           | brain, axial                                                                    |
| Diffusion MRI                 | <input type="checkbox"/> Used <input checked="" type="checkbox"/> Not used      |

### Preprocessing

|                            |                                                                                                                                                                                                                    |
|----------------------------|--------------------------------------------------------------------------------------------------------------------------------------------------------------------------------------------------------------------|
| Preprocessing software     | Tensorflow, custom code                                                                                                                                                                                            |
| Normalization              | simple uint8 (0, 255) to float32 normalization                                                                                                                                                                     |
| Normalization template     | <i>Describe the template used for normalization/transformation, specifying subject space or group standardized space (e.g. original Talairach, MNI305, ICBM152) OR indicate that the data were not normalized.</i> |
| Noise and artifact removal | None                                                                                                                                                                                                               |
| Volume censoring           | None                                                                                                                                                                                                               |

### Statistical modeling & inference

|                         |                                        |
|-------------------------|----------------------------------------|
| Model type and settings | AI model with statistical measurements |
|-------------------------|----------------------------------------|

Effect(s) tested

N/A

Specify type of analysis:  Whole brain  ROI-based  Both

Statistic type for inference

*Specify voxel-wise or cluster-wise and report all relevant parameters for cluster-wise methods.*(See [Eklund et al. 2016](#))

Correction

*Describe the type of correction and how it is obtained for multiple comparisons (e.g. FWE, FDR, permutation or Monte Carlo).*

## Models & analysis

n/a

Involved in the study

- Functional and/or effective connectivity
- Graph analysis
- Multivariate modeling or predictive analysis
